# Supplementary material
Source: MDPI journal article supplement (https://www.mdpi.com/2073-4395/13/6/1656)
Supplement: s1 [file s1]

Archive with 7 entries (7 files):
- Figure S1.pdf
- Figure S2.pdf
- Figure S3.pdf
- Table S1.xlsx
- Table S2.xls
- Table S3.xls
- Table S4.xlsx
