# Supplementary material
Source: MDPI journal article supplement (https://www.mdpi.com/2073-4395/13/6/1656)
Supplement: s1 [file s1 › Table S1.xlsx]

## Sheet: Sheet1
Table S1. Temperature of air and soil during the treatment.
	Air temperauture	Soil temperature of the control	Soil temperature of the mulch
Maximum value	37.3	21.9	20
Minimum value	5.9	14	13.8
Average value	18.23	17.81	17.08
Maximum value-Minimum value	31.4	7.9	6.2
