# Supplementary material
Source: MDPI journal article supplement (https://www.mdpi.com/2073-4395/13/6/1656)
Supplement: s1 [file s1 › Table S2.xls]

## Sheet: Sheet1
Table S2. Number of reads of 16S rRNA amplicon sequence.
Sample name	Sequence count
Control1	88236
Control2	6244
Control3	83842
Mulch1	75309
Mulch2	89880
Mulch3	94279
