# Supplementary material
Source: MDPI journal article supplement (https://www.mdpi.com/2073-4395/13/6/1656)
Supplement: s1 [file s1 › Table S3.xls]

## Sheet: Sheet1
Table S3. Number of reads of ITS rRNA amplicon sequence.
Sample name	Sequence count
Control1	86970
Control2	85744
Control3	87421
Mulch1	84389
Mulch2	78791
Mulch3	92839
