# Supplementary material
Source: MDPI journal article supplement (https://www.mdpi.com/2073-4395/13/6/1656)
Supplement: s1 [file s1 › Table S4.xlsx]

## Sheet: Sheet1
Table S4. Statistics of all sample quality summary after filtering.
Sample ID	Total reads	Total bases	Q20 rate	Q30 rate	GC content
CKRoot1	40040600	5758863455	0.978246	0.936048	0.451969
CKRoot2	41139802	5878726295	0.977198	0.933201	0.446492
CKRoot3	44188488	6357380733	0.97809	0.935471	0.453849
TRoot1	47131234	6778145286	0.979385	0.938619	0.457294
TRoot2	45587838	6565969033	0.978439	0.936264	0.45822
TRoot3	52105446	7502649063	0.978699	0.936398	0.455785
