# Supplementary material
Source: MDPI journal article supplement (https://www.mdpi.com/2073-4395/13/6/1656)

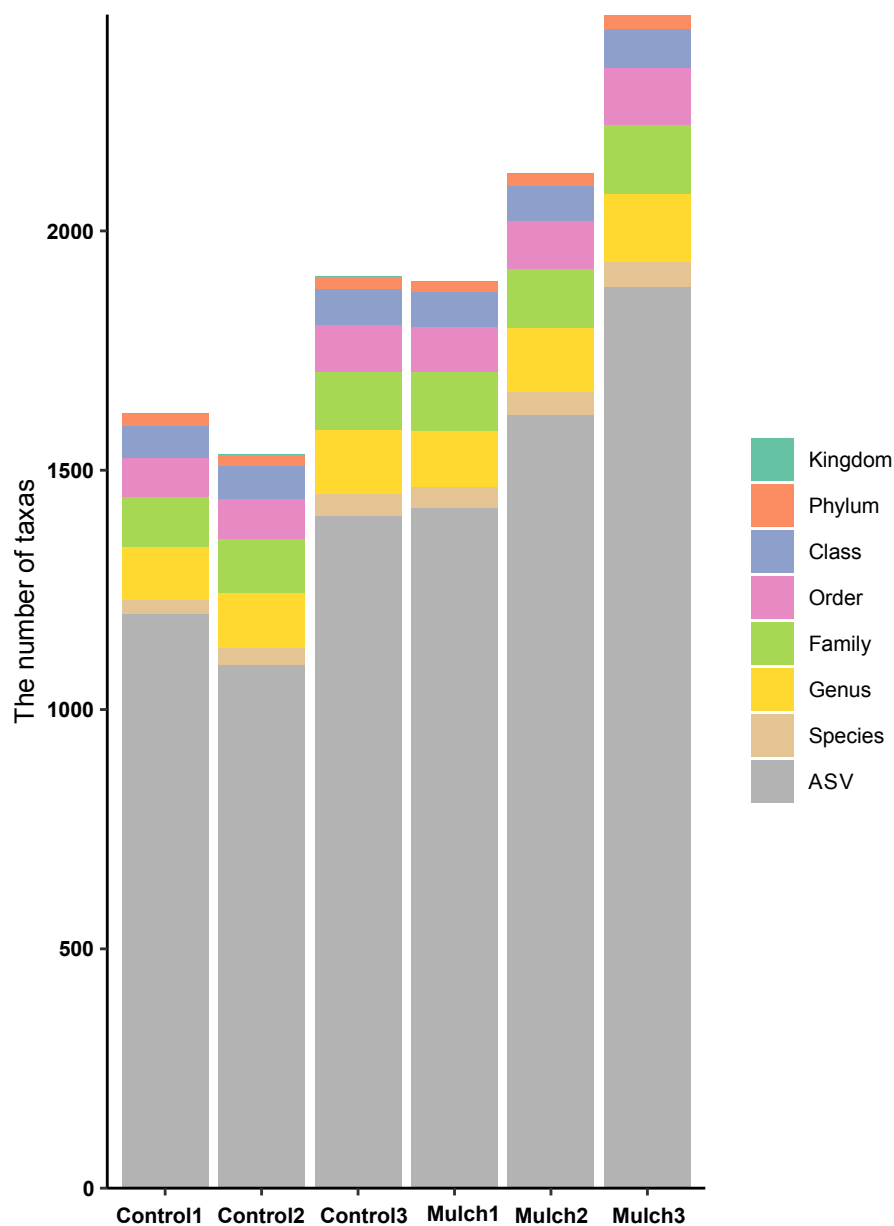

Supplement: s1 [file s1]

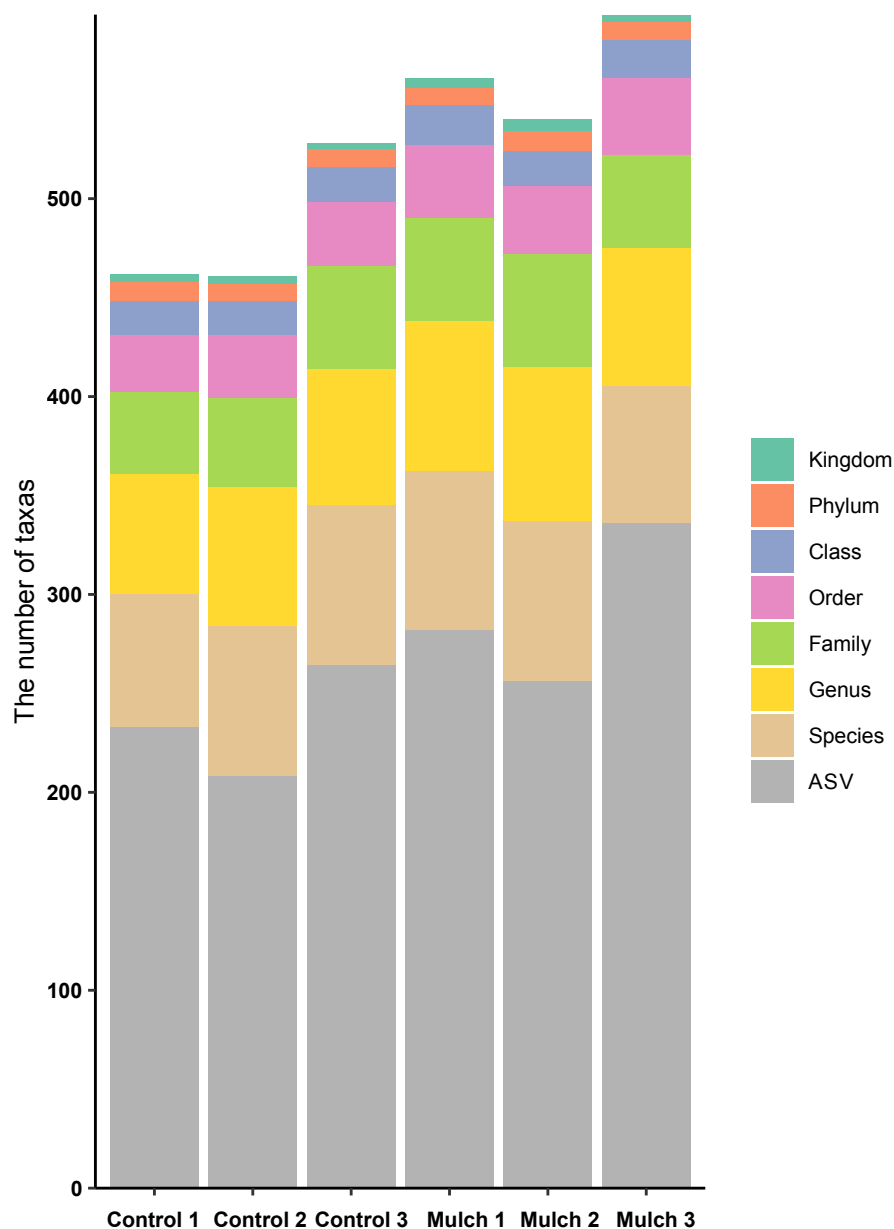

Supplement: s1 [file s1 › Figure S2.pdf]

Cluster Dendrogram

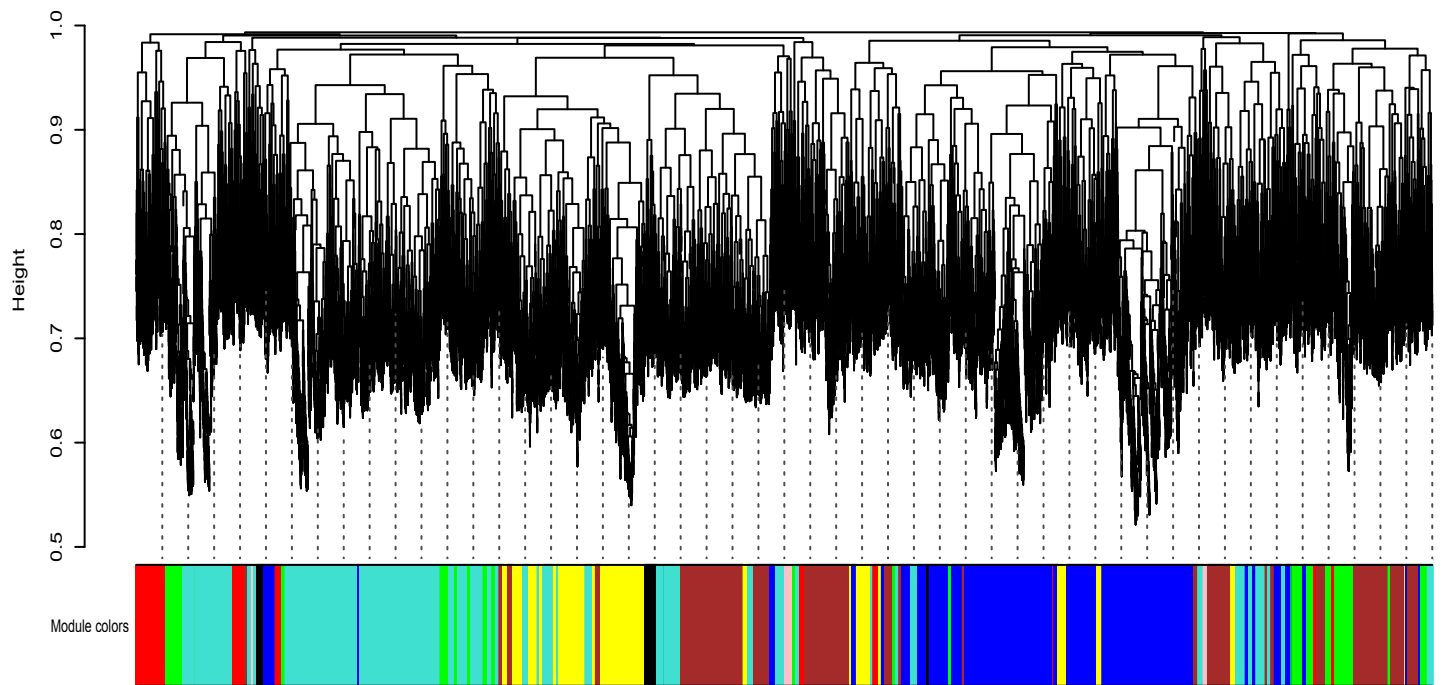

Supplement: s1 [file s1 › Figure S3.pdf]
